# Supplementary material for: Whole Transcriptome Profiling Identifies CD93 and Other Plasma Cell Survival Factor Genes Associated with Measles-Specific Antibody Response after Vaccination
Source: PLoS One. 2016 Aug 16;11(8):e0160970. doi: 10.1371/journal.pone.0160970 (PMC4987012; doi:10.1371/journal.pone.0160970)
Supplement: S1 Table — (DOCX) [file pone.0160970.s001.docx]

**S1 Table.** Immune response variables of the study subjects

| **Immune**  **Outcome** | **Ab Response Category** | **Median (IQR)**a | **p-value**b |
| --- | --- | --- | --- |
| IFNα | High | 284 (171, 805) | 0.075 |
|  | Low | 579 (443, 912) |  |
| IFNλ1 | High  Low | 15 (-10, 41)  31 (12, 73) | 0.062 |
| IFNγ | High | 54 (39, 121) | 0.740 |
|  | Low | 58 (21, 95) |  |
| IL-10 | High | 18 (11, 57) | 0.362 |
|  | Low | 15 (11, 22) |  |
| IL-2 | High | 42 (12, 59) | 0.901 |
|  | Low | 37 (23, 70) |  |
| IL-6 | High | 325 (153, 518) | 0.590 |
|  | Low | 365 (286, 474) |  |
| TNFα | High | 18 (11, 26) | 0.062 |
|  | Low | 8 ( 4, 21) |  |
| IFNγ Elispot | High | 24 (9, 44) | 0.965 |
| SFU x 200000 cells | Low | 44 (3, 77) |  |
| Antibody (PRMN,mIU/mL) | High | 5188 (4594, 5365) | NAc |
|  | Low | 88 (58, 115) |  |

aValues are in mIU/mL for antibody titers (PRMN), cytokine spot-forming units (SFUs) per 2 x 105 cells for Elispot responses and pg/mL for cytokines responses ± IQR, inter-quartile range with 25% and 75% quartiles

Elispot response and cytokine response is defined as the median measles virus-stimulated response for each subject (from triplicate measurements) minus the median unstimulated response (also from triplicate measurements). Negative values indicate that stimulated values were on average smaller than unstimulated values.

bP-values were calculated using Wilcoxon Rank Sum test

cNot applicable, subjects were selected based on high/low antibody titer.
